# Supplementary material for: Pinostrobin inhibits proliferation and induces apoptosis in cancer stem-like cells through a reactive oxygen species-dependent mechanism
Source: PubMed Central journal article supplement — RSC Adv. 2019 Apr 16;9(21):12097–109. doi: 10.1039/c8ra08380k (PMC9063484; doi:10.1039/c8ra08380k), 2019-04-16
Supplement: RA-009-C8RA08380K-s001.pdf [file RA-009-C8RA08380K-s001.pdf]

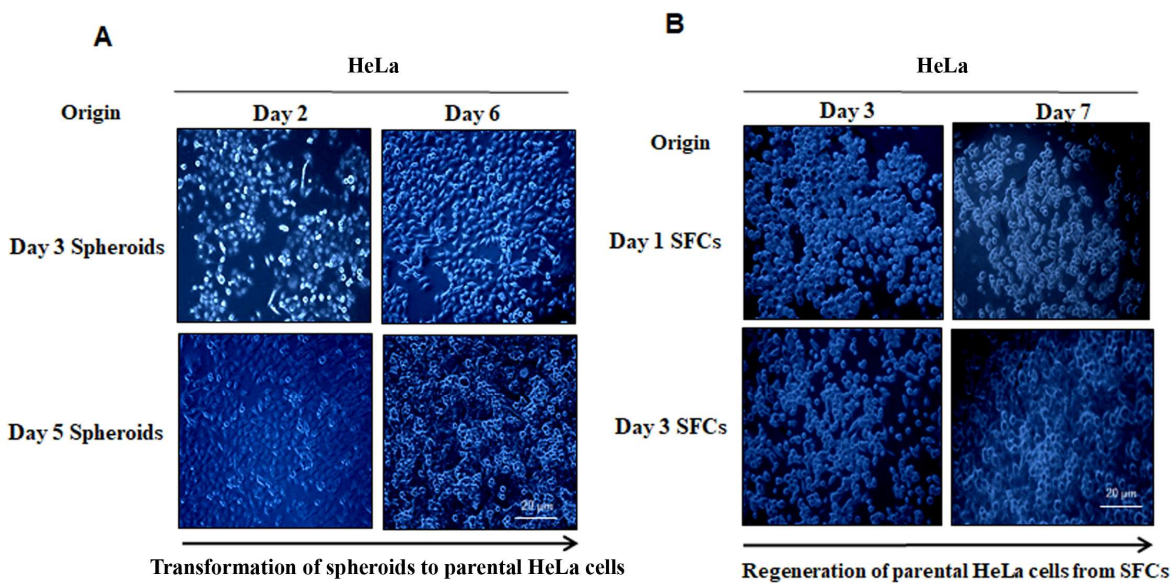

**Figure S1. Regeneration capacity of spheroids and SFCs to parent HeLa cells (A)** Transformation of spheroids to parental HeLa cell morphology from 2 & 6-days of spheroids culture cells (B) Regeneration of parental HeLa cells from 1 & 3-day SFC in constituted DMEM culture conditions.

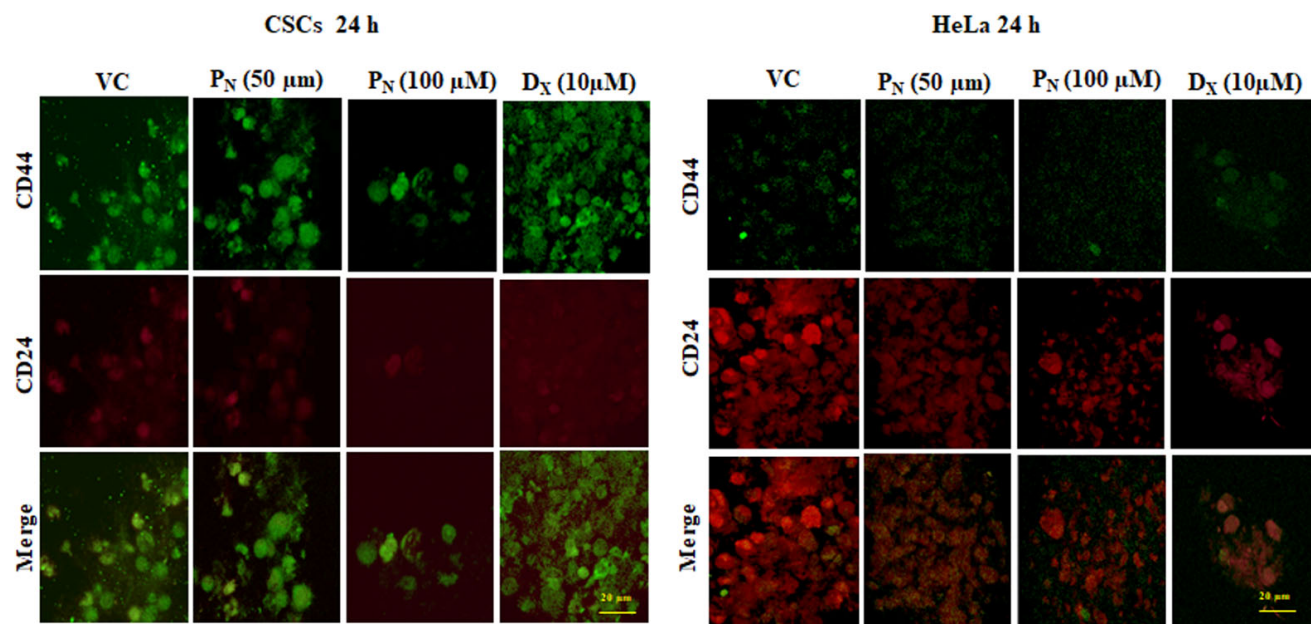

**Figure S2. Effect of P<sub>N</sub> on CD44<sup>+</sup> and CD24<sup>+</sup> expression.** HeLa cells and CSCs, treated with the vehicle and different concentrations of P<sub>N</sub> for 24 h, were stained with FITC-conjugated anti-CD44 and PE-conjugated anti-CD24 antibodies and visualized (40×) under confocal microscopy. VC, Vehicle Control; P<sub>N</sub>, Pinostrobin; D<sub>X</sub>, Doxorubicin
